# Supplementary material
Source: PubMed Central journal article supplement (PMC4184449)
Supplement: pr500506z_si_001.pdf [file pr500506z_si_001.pdf]

## Supporting information:

### Section S-1

#### Methods

Glycoproteins were subjected to reduction (dithiothreitol), alkylation (iodoacetamide) and overnight tryptic digestion in the presence of 2,2,2-trifluoroethanol (5%) as denaturant, and ammonium bicarbonate (100 mM) as pH buffer. Reactions were stopped by heating at 95° C for 5 min. The masses of resulting peptides were analyzed using a Bruker Ultraflexxtreme MALDI MS (Bruker Daltonics, Billerica, MA) using 2,5-dihydroxybenzoic acid (DHB) as matrix. The samples were then dried down in a centrifugal evaporator.

Dry tryptic digests were reconstituted in a 1:1 mixture of water and acetonitrile with 0.1% formic acid to a 1 mg/mL concentration. The samples were then diluted in the appropriate loading conditions for C18 (98% water, 2% acetonitrile, 0.1% formic acid) or HILIC-C18 (80% acetonitrile, 20% water, 0.1% trifluoroacetic acid) analysis to approximately 100 fmol/μL and injected into the LC/MS system using the Agilent 1200 series autosampler. All analyses were performed on an Agilent 1200 series LC system capable of delivering nanoliter flow rates coupled to an Agilent 6550 ion-funnel quadrupole time-of-flight (Q-TOF) mass spectrometer, equipped with a chip-cube ionization source (Agilent Technologies, Santa Clara, CA), in the positive ion mode.

Approximately, 1 μg and 0.1 μg of the total proteolytic digests were injected without any cleanup for analyses on HILIC-C18 or C18 chip-LC/MS, respectively. Lower amounts of total material were loaded onto the C18 chip because in the absence of enrichment, the non-glycosylated peptides led to signal saturation. The Agilent HPLC chip consisted of laser ablated channels that were packed with appropriate stationary phases. The C18 chip used was a commercially available Polaris-HR-Chip-3C18 chip (Agilent Technologies, Santa Clara, CA) with a 75μm X 150mm separation/analytical column and a 360nL enrichment column, both packed with 3μm particle size and 180Å pore size, Agilent Polaris C18-A stationary phase. The HILIC-C18 hybrid chip consisted of a 75μm X 150mm analytical column packed with 5μm particle size and Polaris C18-A stationary phase and a 40nL enrichment column, packed with Amide-80 stationary phase (Tosoh Biosciences, Montgomeryville, PA), 5μm particle size and 80Å pore size. This chip is available from the vendor as a custom order. A binary pump with microliter flow rates was used as the “loading pump” to deliver sample and solvent to the trapping/enrichment column and a nanoscale pump was used as the “gradient pump” to deliver the gradient once the trapping and analytical columns were inline.

The HPLC mobile phases for the C18 chip were as follows: Solvent A was 99% water, 1% acetonitrile modified with 0.1% formic acid. Solvent B was 99% acetonitrile, 1% water modified with 0.1% formic acid. The enrichment column was equilibrated using the loading pump which was constantly pumping 98% solvent A and 2% solvent B as loading conditions. The sample was washed on the enrichment column with 4μL of the loading condition solvent and then the 6 port valve was switched to bring the enrichment column in-line with the analytical column. The analytical pump was used to deliver the solvent after the valve switched. 98% solvent A was pumped for the first 10 minutes after a gradient was

started from 98% solvent A to 15% solvent A over 30 min. The solvent conditions were then changed to 5% solvent A in the next 2 min and kept constant for 5 min thereafter to wash the columns. The columns were brought back to the starting condition, 98% solvent A, in 3 min and then equilibrated for 5 min.

For the HILIC-C18 chip, the HPLC conditions were as follows. Solvent A was 99% water, 1% acetonitrile with 0.1% formic acid. Solvent B was 99% acetonitrile, 1% water with 0.1% formic acid. A premixed special loading solvent, 80% acetonitrile, 20% water, modified with 0.1% trifluoroacetic acid, was delivered using the loading pump in this case as the loading condition. The samples were loaded and washed on the trapping column using the loading pump with 4 $\mu$ L of the special loading solvent. These high organic conditions were used to allow binding of the glycosylated peptides to the HILIC trapping column which the non-glycosylated peptides were washed away to waste. The analytical column was equilibrated with the regular mobile phases at 98% solvent A. After the washing step was complete, the trapping column was brought in-line with the analytical column and the setup received flow from the nanoscale analytical pump, which delivered 98% solvent A for the first 10 min. These high-aqueous conditions allowed elution of the glycosylated peptides from the HILIC trapping column and binding to the C18 reversed phase analytical column. After this a gradient was delivered by the analytical pump to resolve and elute the glycopeptides from the C18 analytical column. The gradient was similar to that used in the C18 chip setup. Mobile phase was changed from 98% solvent A to 15% solvent A over 30 min. The solvent conditions were then changed to 5% solvent A in the next 2 min and kept constant for 5 min thereafter to wash the columns. The columns were brought back to the starting condition, 98% solvent A, in 3 min and then equilibrated for 5 min.

Both HPLC chips (C18 and HILIC-C18) consisted of an integrated nano-ESI source, to allow sample introduction into the mass spectrometer. The MS and tandem MS conditions used for both C18 and HILIC-C18 runs were the same. Data dependent tandem mass spectra were acquired for the first 40 minutes of the run. Top 5 most abundant, multiply charged precursor ions were selected for fragmentation with dynamic exclusion enabled after 10 spectra for each precursor. MS spectra were acquired in the 200-2000  $m/z$  range and MS/MS spectra in the 50-3000  $m/z$  range. MS and MS/MS spectra were acquired at rates of 4 and 1 spectra/s, respectively. An isolation width of 4  $m/z$  was used. Nitrogen was used as the collision gas and collision energy varied with precursor  $m/z$ . The collision energy was determined dynamically as a linear function of precursor  $m/z$ , with a slope of 5 and offset of -4.8 to yield peptide backbone fragments. For only glycan dissociation, a lower collision energy can be used, also calculated using the precursor  $m/z$ , with a slope of 0.9 and offset of 2. Data were acquired in the positive ion mode with source capillary voltage set at 2150 V for the first 40 minutes of the run. Drying gas flow was 13 l/min for the first 25 minutes and 11 l/min, thereafter with gas temperature set at 225°C throughout the run. Data files were acquired using Agilent MassHunter Workstation Data Acquisition software and analyzed using Agilent MassHunter Qualitative Analysis software package.

### **Online HILIC enrichment setup on 2.1mm column scale**

To demonstrate that the use of online HILIC enrichment setup prior to reversed phase separation is not limited to the chip platform, we carried our glycopeptide enrichment and separation on an LC system consisting of a 4.6mm ID guard column driven by an LC pump, an external valve to interface the guard

column to the separation column, and a 2.1 mm ID separation column driven by a second LC pump. Specifically, glycopeptides were enriched using a 4.6 mm x 1.0 cm Amide-80 guard column (5  $\mu\text{m}$  Amide-80, Tosoh) flowing at 500  $\mu\text{L min}^{-1}$  with a solvent composition of 80% ACN 0.1% TFA. After enrichment, the external valve was triggered and glycopeptides were separated using two 2.1 mm x 10 cm 300 SB-C18 columns (1.8 $\mu\text{m}$ , Agilent Technologies) connected in series. The separation gradient was supplied by a 1290 binary LC (Agilent Technologies) at a flow rate of 200  $\mu\text{L min}^{-1}$ . Solvent A was 0.1% formic acid in water and solvent B was 0.1% formic acid in acetonitrile. Glycopeptides were separated by gradient that reached 42% B in 20 minutes. The separation was performed on-line with a 6550 QTOF (Agilent Technologies). Five  $\mu\text{L}$  of a 2  $\text{pmol } \mu\text{L}^{-1}$  tryptic digest of transferrin was injected onto the LC/MS system. The resulting LC-MS chromatogram has been presented in figure S-4.

## Section S-2: Supplementary Figures

**Figure S-1:** Oxonium ion distributions. Base peak chromatograms from LC-MS/MS runs using HILIC-C18 and C18 chips, A and B, respectively, overlaid with respective extracted ion chromatograms for  $m/z$  204.0864 (HexNAc).

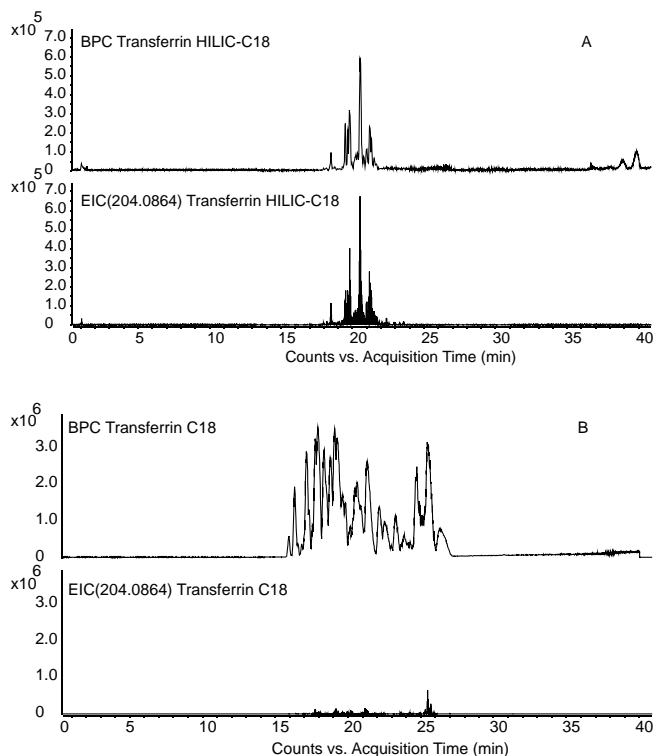

**Figure S-1 (a)** Transferrin HILIC-C18 (A) vs. C18 (B)

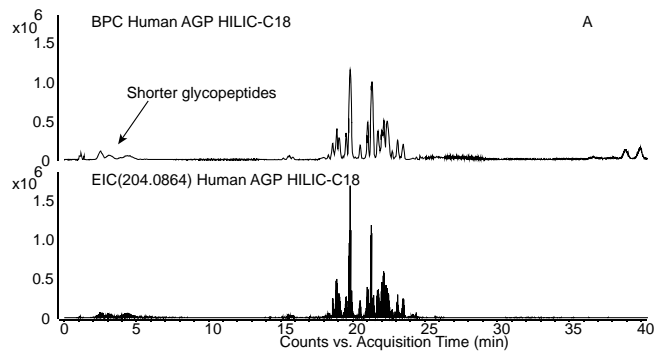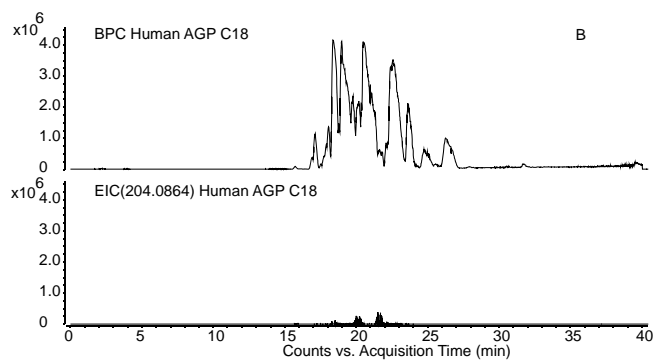

**Figure S-1 (b)** Alpha-1-acid glycoprotein HILIC-C18 (A) vs. C18 (B)

**Figure S-2 Tandem MS of glycopeptides (See tables 2 and S-3 for details of product ions assigned)**

Glycopeptide identifier is listed as Peptide-[a,b,c,d,e], where:

a = number of Hexoses

b = number of N-acetylhexosamines

c = number of Deoxyhexoses

d = number of N-acetylneuraminic acids

e = number of N-glycolylneuraminic acids

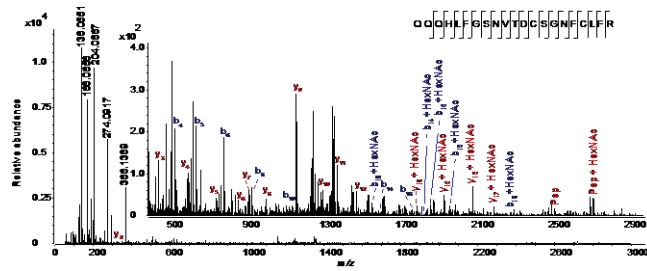

**Figure S-2 (a)** Tandem MS of Transferrin glycopeptide precursor ion 1180.7328  $[M+4H]^{4+}$ , identified as QQQHLFGSNVTDCSGNFCLFR-[5,4,0,2,0]

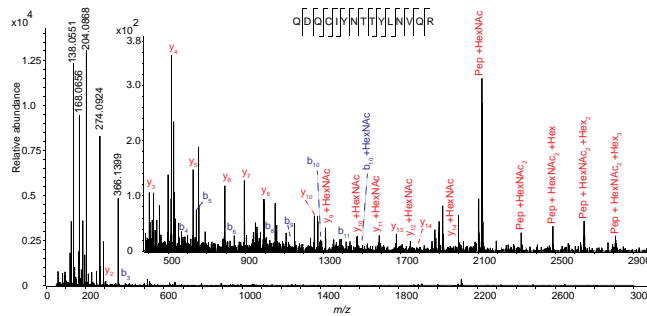

**Figure S-2 (b)** Tandem mass spectrum of AGP glycopeptide precursor ion 1194.9870  $[M+4H]^{4+}$ , identified as QDQCIYNTTYLNVQR-[6,5,0,3,0]

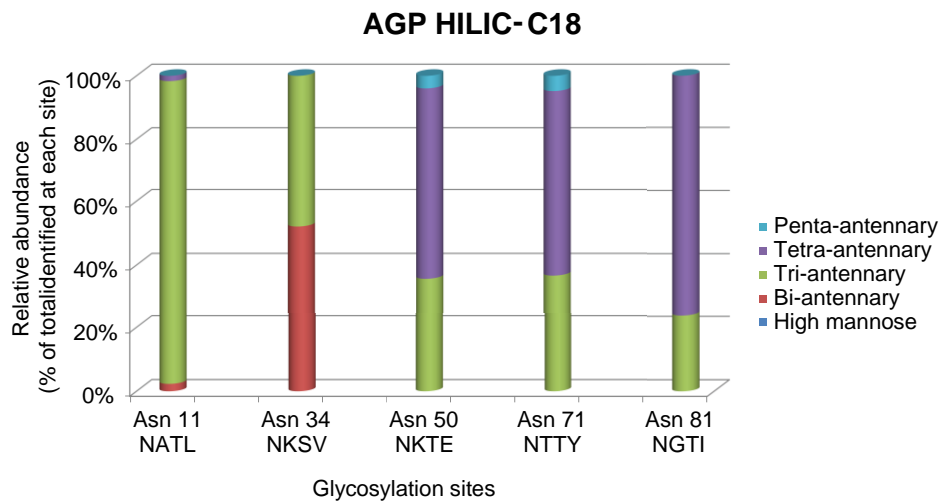

**Figure S-3:** Site-specific glycan profile of AGP

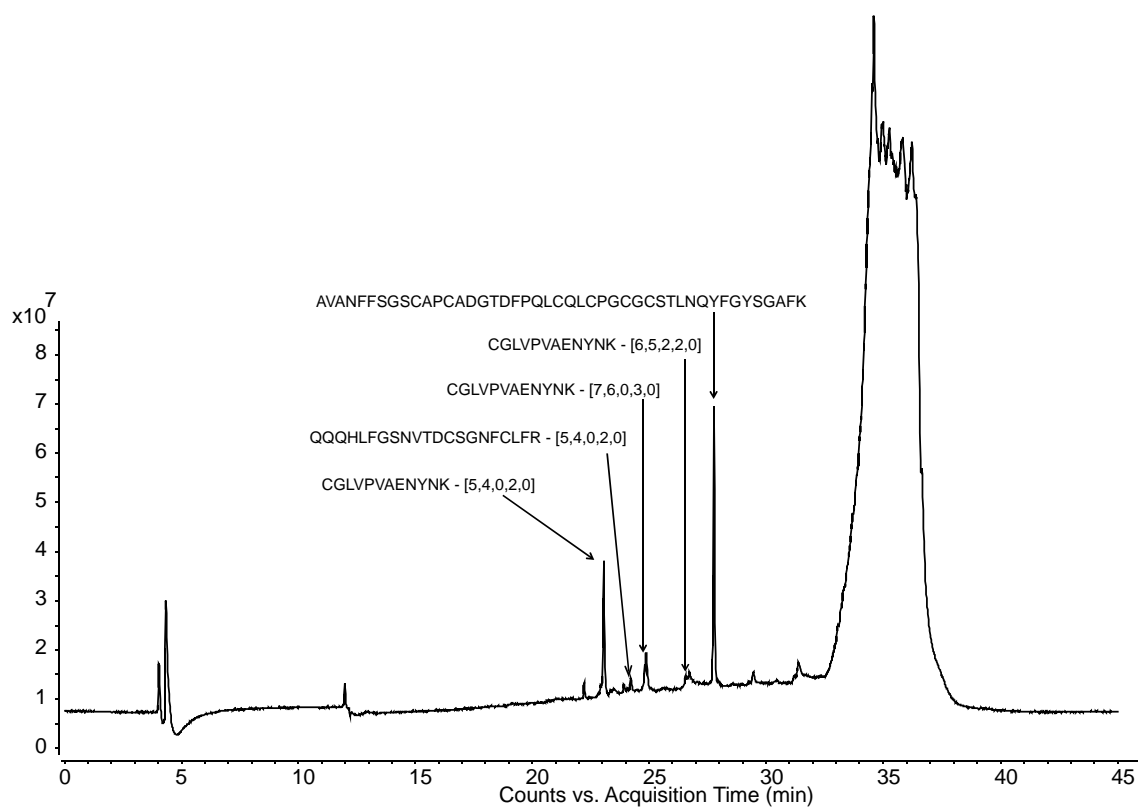

**Figure S-4** HILIC-C18-MS of Transferrin tryptic digest on 2.1mm column scale. Glycan identifiers are described as [Hex, HexNAc, dHex, NeuAc, NeuGc]. *Note: The large late-eluting peak corresponds to a singly charged column wash artifact ( $m/z$  436.4366).*

## Section S-3

### Theoretical mass lists for manual data analysis and for use with GlycReSoft:

The following standard glycoprotein sequences from UniProt database(<http://www.uniprot.org>) were subjected to theoretical digestion using Protein Prospector's MS-Digest utility (Baker, P.R. and Clauser, K.R. <http://prospector.ucsf.edu>):

1. Serotransferrin precursor - Homo sapiens (Human) - P02787
2. Alpha-1-acid glycoprotein 1 precursor - Homo sapiens (Human) – P02763
3. Recombinant hemagglutinin from A/USSR/90/1977 (H1N1) (Genebank #: ABD60933), amino acid 18-345 with sequence:  
DTICIGYHANNSTDTVDTVLEKNVTVTHSVNLLSDHNGKLCRLKGIAPLQLGKCSIAGWILGNPECESLVSKKS  
WSYIAETPNSENGTCYPGYFADYEELREQLSSVSSFERFEIFPKERSWPKHNVTRGVGTASCCHKGKSSFYRNL  
WLTEKNGSYPNLSKSYVNNKEKEVLVLWGVVHPSNIEDQKTIYRKENAYVSVVSSNYNRRFTPEIAERPQVRG  
QAGRINYYWTLLEPGDTIIFEANGNLIAPWHAFALNRGFGSGIITSNASMDECDTKCQTPQGAINSSLPFQNIH  
PVTIGCEPKYVRSTKLRMVTGLRNIPSIQSRG

Transferrin, AGP and hemagglutinin were subjected to theoretical digestion using trypsin with up to 2 missed cleavages and carbamidomethyl as the constant modification. Asparagine deamidation was used as the variable modification for hemagglutinin only. For transferrin and AGP, known glycopeptides were combined with a list of glycans to generate theoretical glycopeptides. For HA, the NetNGlyc 1.0 server (<http://www.cbs.dtu.dk/services/NetNGlyc>) was used to predict glycosylation sites. The  $m/z$ 's from data files were matched to the theoretical neutral mass lists within an error tolerance of +/- 10 ppm.

The lists of glycopeptides/peptides for each glycoprotein studied have been provided, as Table S-1 with the number of glycosylation sites/sequons considered as occupied on the glycopeptides. The masses of peptides listed below are for neutral peptides. The possible glycans considered occupying each sequon are listed in Table S-2, with their neutral masses. ***(Both tables are downloadable as separate Excel spreadsheets with the supporting information.)***

To the glycopeptides listed in table S-1, glycan masses (table S-2) were added to generate glycopeptides. Glycan compositions used for the glycoproteins consisted possible glycan structures ranging from *N*-glycan core (Hex<sub>3</sub>, HexNAc<sub>2</sub>) to complex type penta-antennary structures containing *N*-acetylneuraminic acid and the high mannose type *N*-glycans. Glycan identifiers are listed as [a,b,c,d,e], where [a,b,c,d,e] describe the glycan compositions as follows:

- a = number of Hexoses
- b = number of N-acetylhexosamines
- c = number of Deoxyhexoses
- d = number of N-acetylneuraminic acids
- e = number of N-glycolylneuraminic acids

Section S-4

Peptide fragment ion mass tables for HILIC-C18 LC-MS/MS of glycopeptides identified and presented in Table 2.

Table S-3 (a) Transferrin glycopeptides tandem MS

|              | HILIC-C18                           |                     | <i>m/z</i>             | <i>z</i>  |
|--------------|-------------------------------------|---------------------|------------------------|-----------|
| Glycopeptide | QQQHFLFGSNVTDCSGNFCLFR -[6,5,1,3,0] |                     | 1381.3025              | 4+        |
| Peptide      | QQQHFLFGSNVTDCSGNFCLFR              |                     |                        |           |
|              |                                     | Observed <i>m/z</i> | Theoretical <i>m/z</i> | ppm error |
|              | y 1                                 | 175.1174            | 175.118952             | -8.86     |
|              | y 2                                 | 322.1828            | 322.187366             | -14.17    |
|              | y 5                                 | 742.3584            | 742.370428             | -16.20    |
|              | y 6                                 | 856.4059            | 856.413356             | -8.71     |
|              | y 7                                 | 913.4311            | 913.434819             | -4.07     |
|              | y 8                                 | 1000.4518           | 1000.46685             | -15.04    |
|              | y 9                                 | 1160.4855           | 1160.49743             | -10.28    |
|              | y 10                                | 1275.5098           | 1275.52438             | -11.43    |
|              | y 11                                | 1376.5634           | 1376.57205             | -6.29     |
|              | y 12                                | 1475.6080           | 1475.64047             | -22.00    |
|              | y 15                                | 1733.7168           | 1733.73689             | -11.59    |
|              | y 16                                | 1880.8397           | 1880.8053              | 18.29     |
|              | y 17                                | 1993.8799           | 1993.88937             | -4.75     |
|              | y 18                                | 2130.9503           | 2130.94828             | 0.95      |
|              | y 13 + HexNAc                       | 1792.7768           | 1792.76277             | 7.83      |
|              | y 14 + HexNAc                       | 1879.7452           | 1879.79479             | -26.38    |
|              | y 15 + HexNAc                       | 1936.8295           | 1936.81626             | 6.84      |
|              | y 17 + HexNAc                       | 2196.9882           | 2196.96874             | 8.86      |
|              | y 18 + HexNAc                       | 2333.9954           | 2334.02765             | -13.82    |
|              | b 2                                 | 257.1224            | 257.124431             | -7.90     |
|              | b 3                                 | 385.1798            | 385.183009             | -8.33     |
|              | b 4                                 | 522.2357            | 522.241921             | -11.91    |
|              | b 5                                 | 635.3218            | 635.325985             | -6.59     |
|              | b 6                                 | 782.3807            | 782.394398             | -17.51    |
|              | b 8                                 | 926.4407            | 926.447891             | -7.76     |
|              | b 9                                 | 1040.4698           | 1040.49082             | -20.20    |
|              | b 13                                | 1515.6835           | 1515.66444             | 12.58     |
|              | b 14 + HexNAc                       | 1805.7502           | 1805.77584             | -14.20    |
|              | b 15 + HexNAc                       | 1862.8244           | 1862.7973              | 14.55     |
|              | Peptide + HexNAc                    | 2718.1394           | 2718.20338             | -23.54    |



|  |                                |         |         |  |
|--|--------------------------------|---------|---------|--|
|  |                                |         |         |  |
|  | possible backbone product ions | 20.0000 | % found |  |
|  | y ions                         | 16.00   | 80%     |  |
|  | b ions                         | 10.00   | 50%     |  |

|              | <b>HILIC-C18</b>                    |                     | <i>m/z</i>             | <i>z</i>  |
|--------------|-------------------------------------|---------------------|------------------------|-----------|
| Glycopeptide | QQQHFLFGSNVTDCSGNFCLFR -[5,4,0,2,0] |                     | 1180.7328              | 4+        |
| Peptide      | QQQHFLFGSNVTDCSGNFCLFR              |                     |                        |           |
|              |                                     | Observed <i>m/z</i> | Theoretical <i>m/z</i> | ppm error |
|              | y 1                                 | 175.1185            | 175.1190               | -2.58     |
|              | y 2                                 | 322.1872            | 322.1874               | -0.51     |
|              | y 3                                 | 435.2695            | 435.2714               | -4.43     |
|              | y 4                                 | 595.3050            | 595.3020               | 5.02      |
|              | y 5                                 | 742.3654            | 742.3704               | -6.77     |
|              | y 6                                 | 856.3990            | 856.4134               | -16.76    |
|              | y 7                                 | 913.4225            | 913.4348               | -13.49    |
|              | y 8                                 | 1000.4547           | 1000.4668              | -12.14    |
|              | y 9                                 | 1160.4902           | 1160.4974              | -6.23     |
|              | y 10                                | 1275.5185           | 1275.5244              | -4.61     |
|              | y 11                                | 1376.5675           | 1376.5721              | -3.31     |
|              | y 12                                | 1475.6279           | 1475.6405              | -8.52     |
|              | y 13                                | 1589.6846           | 1589.6834              | 0.76      |
|              | y 14                                | 1676.6916           | 1676.7154              | -14.21    |
|              | y 15                                | 1733.7374           | 1733.7369              | 0.30      |
|              | y 16                                | 1880.7859           | 1880.8053              | -10.32    |
|              | y 17                                | 1993.8961           | 1993.8894              | 3.38      |
|              | y 18                                | 2130.9452           | 2130.9483              | -1.44     |
|              | y 19                                | 2258.9746           | 2259.0069              | -14.28    |
|              | y 13 + HexNAc                       | 1792.7565           | 1792.7628              | -3.49     |
|              | y 15 + HexNAc                       | 1936.8053           | 1936.8163              | -5.66     |
|              | y 16 + HexNAc                       | 2083.8727           | 2083.8847              | -5.74     |
|              | y 17 + HexNAc                       | 2196.9742           | 2196.9687              | 2.49      |
|              | b 2                                 | 257.1238            | 257.1244               | -2.45     |
|              | b 3                                 | 385.1794            | 385.1830               | -9.37     |
|              | b 4                                 | 522.2386            | 522.2419               | -6.36     |
|              | b 5                                 | 635.3246            | 635.3260               | -2.18     |
|              | b 6                                 | 782.3917            | 782.3944               | -3.45     |
|              | b 8                                 | 926.4447            | 926.4479               | -3.44     |
|              | b 9                                 | 1040.5048           | 1040.4908              | 13.44     |
|              | b 10                                | 1139.5450           | 1139.5592              | -12.49    |
|              | b 14                                | 1602.6972           | 1602.6965              | 0.46      |

|  |                                |           |           |        |
|--|--------------------------------|-----------|-----------|--------|
|  | b 16                           | 1773.7319 | 1773.7609 | -16.33 |
|  | b 9 + HexNAc                   | 1243.5625 | 1243.5702 | -6.18  |
|  | b 11 + HexNAc                  | 1443.6720 | 1443.6863 | -9.89  |
|  | b 12 + HexNAc                  | 1558.7207 | 1558.7132 | 4.80   |
|  | b 14 + HexNAc                  | 1805.7800 | 1805.7758 | 2.31   |
|  | b 15 + HexNAc                  | 1862.7935 | 1862.7973 | -2.04  |
|  | b 16 + HexNAc                  | 1976.8756 | 1976.8402 | 17.89  |
|  | b 18 + HexNAc                  | 2283.9704 | 2283.9392 | 13.65  |
|  | Peptide                        | 2515.1287 | 2515.1240 | 1.86   |
|  | Peptide + HexNAc               | 2718.1905 | 2718.2034 | -4.74  |
|  | Peptide + HexNAc - Water       | 2700.1619 | 2700.1930 | -11.52 |
|  |                                |           |           |        |
|  | possible backbone product ions | 20.0000   | % found   |        |
|  | y ions                         | 19.00     | 95%       |        |
|  | b ions                         | 14.00     | 70%       |        |

|              | <b>HILIC-C18</b>          |                     | <i>m/z</i>             | <i>z</i>  |
|--------------|---------------------------|---------------------|------------------------|-----------|
| Glycopeptide | CGLVPVLAENYNK-[5,4,0,2,0] |                     | 921.1389               | 4+        |
| Peptide      | CGLVPVLAENYNK             |                     |                        |           |
|              |                           | Observed <i>m/z</i> | Theoretical <i>m/z</i> | ppm error |
|              | y 1                       | 147.1107            | 147.1128               | -14.30    |
|              | y 2                       | 261.1531            | 261.1557               | -10.08    |
|              | y 6                       | 738.3419            | 738.3417               | 0.28      |
|              | y 9                       | 1047.5368           | 1047.5469              | -9.68     |
|              | y 10                      | 1146.6207           | 1146.6154              | 4.67      |
|              | y 4 + HexNAc              | 741.3462            | 741.3414               | 6.53      |
|              | y 5 + HexNAc              | 870.3922            | 870.3840               | 9.48      |
|              | y 7 + HexNAc              | 1054.4910           | 1054.5051              | -13.40    |
|              | y 9 + HexNAc              | 1250.6159           | 1250.6263              | -8.32     |
|              | y 10 + HexNAc             | 1349.6940           | 1349.6947              | -0.53     |
|              | b 2                       | 218.0588            | 218.05932              | -2.40     |
|              | b 3                       | 331.1433            | 331.14339              | -0.27     |
|              | b 4                       | 430.2125            | 430.2118               | 1.62      |
|              | b 5                       | 527.2667            | 527.26457              | 4.05      |
|              | b 6                       | 626.3438            | 626.33298              | 17.27     |
|              | b 8                       | 810.4497            | 810.45416              | -5.50     |
|              | b 10                      | 1053.5576           | 1053.5397              | 17.01     |
|              | b 11                      | 1216.5864           | 1216.603               | -13.65    |
|              | Peptide                   | 1476.7515           | 1476.7515              | 0.03      |
|              | Peptide + HexNAc          | 1679.8191           | 1679.8308              | -6.98     |
|              | peptide + HexNAc2 + Hex3  | 2369.0745           | 2369.0687              | 2.46      |

|  |                                |         |         |  |
|--|--------------------------------|---------|---------|--|
|  |                                |         |         |  |
|  | possible backbone product ions | 12.0000 | % found |  |
|  | y ions                         | 8.00    | 67%     |  |
|  | b ions                         | 8.00    | 67%     |  |

|              | <b>HILIC-C18</b>                    |                     | <i>m/z</i>             | <i>z</i>  |
|--------------|-------------------------------------|---------------------|------------------------|-----------|
| Glycopeptide | QQQHFLFGSNVTDCSGNFCLFR -[5,4,1,2,0] |                     | 1217.2468              | 4+        |
| Peptide      | QQQHFLFGSNVTDCSGNFCLFR              |                     |                        |           |
|              |                                     | Observed <i>m/z</i> | Theoretical <i>m/z</i> | ppm error |
|              | y 1                                 | 175.1183            | 175.1189518            | -3.72     |
|              | y 2                                 | 322.1848            | 322.1873657            | -7.96     |
|              | y 3                                 | 435.2672            | 435.2714297            | -9.72     |
|              | y 4                                 | 595.3004            | 595.3020143            | -2.71     |
|              | y 5                                 | 742.3685            | 742.3704282            | -2.60     |
|              | y 6                                 | 856.4138            | 856.4133557            | 0.52      |
|              | y 7                                 | 913.4274            | 913.4348194            | -8.12     |
|              | y 8                                 | 1000.459            | 1000.466848            | -8.14     |
|              | y 9                                 | 1160.49             | 1160.497432            | -6.75     |
|              | y 10                                | 1275.508            | 1275.524375            | -13.15    |
|              | y 11                                | 1376.591            | 1376.572054            | 13.62     |
|              | y 12                                | 1475.626            | 1475.640468            | -10.01    |
|              | y 15                                | 1733.746            | 1733.736887            | 5.49      |
|              | y 16                                | 1880.805            | 1880.805301            | -0.21     |
|              | y 17                                | 1993.915            | 1993.889365            | 12.71     |
|              | y 13 + HexNAc                       | 1792.753            | 1792.762765            | -5.56     |
|              | y 14 + HexNAc                       | 1879.779            | 1879.794794            | -8.56     |
|              | y 16 + HexNAc                       | 2083.894            | 2083.884671            | 4.38      |
|              | y 17 + HexNAc                       | 2196.941            | 2196.968735            | -12.76    |
|              | b 2                                 | 257.1221            | 257.1244311            | -9.07     |
|              | b 3                                 | 385.1815            | 385.1830087            | -3.92     |
|              | b 4                                 | 522.2393            | 522.2419205            | -5.02     |
|              | b 5                                 | 635.3301            | 635.3259845            | 6.48      |
|              | b 6                                 | 782.4043            | 782.3943985            | 12.66     |
|              | b 8                                 | 926.4465            | 926.4478907            | -1.50     |
|              | b 9                                 | 1040.483            | 1040.490818            | -7.61     |
|              | b 14                                | 1602.698            | 1602.696467            | 0.64      |
|              | b 16                                | 1773.742            | 1773.760858            | -10.58    |
|              | b 11 + HexNAc                       | 1443.673            | 1443.686281            | -9.48     |
|              | b 15 + HexNAc                       | 1862.779            | 1862.7973              | -9.99     |
|              | b 16 + HexNAc                       | 1976.806            | 1976.840228            | -17.42    |
|              | Peptide                             | 2515.115            | 2515.12401             | -3.62     |

|  |                                |          |            |       |
|--|--------------------------------|----------|------------|-------|
|  | Peptide + HexNAc               | 2718.178 | 2718.20338 | -9.30 |
|  | Peptide + HexNAc - Water       | 2700.192 | 2700.193   | -0.30 |
|  |                                |          |            |       |
|  | possible backbone product ions | 20.0000  | % found    |       |
|  | y ions                         | 16.00    | 80%        |       |
|  | b ions                         | 11.00    | 55%        |       |

|              | <b>C18</b>                     |                     | <i>m/z</i>             | <i>z</i>  |
|--------------|--------------------------------|---------------------|------------------------|-----------|
| Glycopeptide | CGLVPVLAENYNK -[5,4,0,2,0]     |                     | 921.1389               | 4+        |
| Peptide      | CGLVPVLAENYNK                  |                     |                        |           |
|              |                                | Observed <i>m/z</i> | Theoretical <i>m/z</i> | ppm error |
|              | y 1                            | 147.1117            | 147.1128               | -7.50     |
|              | y 2                            | 261.1555            | 261.1557               | -0.89     |
|              | y 4                            | 538.2579            | 538.262                | -7.59     |
|              | y 6                            | 738.3365            | 738.3417               | -7.04     |
|              | y 9                            | 1047.5342           | 1047.547               | -12.16    |
|              | y 10                           | 1146.6154           | 1146.615               | 0.04      |
|              | y 2 + HexNAc                   | 464.2347            | 464.2351               | -0.86     |
|              | y 4 + HexNAc                   | 741.3468            | 741.3414               | 7.34      |
|              | y 5 + HexNAc                   | 870.3922            | 870.384                | 9.48      |
|              | y 6 + HexNAc                   | 941.4106            | 941.4211               | -11.12    |
|              | y 7 + HexNAc                   | 1054.5059           | 1054.505               | 0.73      |
|              | y 9 + HexNAc                   | 1250.6247           | 1250.626               | -1.28     |
|              | b 2                            | 218.0601            | 218.0593               | 3.56      |
|              | b 3                            | 331.1428            | 331.1434               | -1.78     |
|              | b 4                            | 430.2102            | 430.2118               | -3.72     |
|              | b 8                            | 810.4549            | 810.4542               | 0.92      |
|              | b 9                            | 939.4873            | 939.4968               | -10.06    |
|              | b 10                           | 1053.5326           | 1053.54                | -6.72     |
|              | b 11                           | 1216.6069           | 1216.603               | 3.20      |
|              | b 12                           | 1330.6311           | 1330.646               | -11.15    |
|              | b 12 + HexNAc                  | 1533.7095           | 1533.725               | -10.30    |
|              | Peptide                        | 1476.7521           | 1476.751               | 0.43      |
|              | Peptide + HexNAc               | 1679.8193           | 1679.831               | -6.87     |
|              | Peptide + HexNAc -Water        | 1661.8405           | 1661.82                | 12.17     |
|              | Peptide + 2 HexNAc             | 1882.88             | 1882.91                | -16.04    |
|              | Peptide + 2 HexNAc + 1 Hexose  | 2044.9542           | 2044.963               | -4.31     |
|              | peptide + HexNAc2 + Hex2       | 2207.0612           | 2207.016               | 20.55     |
|              | peptide + HexNAc2 + Hex3       | 2369.1084           | 2369.069               | 16.77     |
|              |                                |                     |                        |           |
|              | possible backbone product ions | 12.0000             | % found                |           |

|  |        |      |     |  |
|--|--------|------|-----|--|
|  | y ions | 8.00 | 67% |  |
|  | b ions | 8.00 | 67% |  |

|              | <b>C18</b>                          |                     | <i>m/z</i>             | <i>z</i>  |
|--------------|-------------------------------------|---------------------|------------------------|-----------|
| Glycopeptide | QQQHFLFGSNVTDCSGNFCLFR -[5,4,0,2,0] |                     | 1180.7328              | 4+        |
| Peptide      | QQQHFLFGSNVTDCSGNFCLFR              |                     |                        |           |
|              |                                     | Observed <i>m/z</i> | Theoretical <i>m/z</i> | ppm error |
|              | y 1                                 | 175.1192            | 175.1190               | 1.42      |
|              | y 2                                 | 322.1851            | 322.1874               | -7.03     |
|              | y 3                                 | 435.2732            | 435.2714               | 4.07      |
|              | y 4                                 | 595.2989            | 595.3020               | -5.23     |
|              | y 5                                 | 742.3674            | 742.3704               | -4.08     |
|              | y 6                                 | 856.4046            | 856.4134               | -10.22    |
|              | y 7                                 | 913.4277            | 913.4348               | -7.79     |
|              | y 8                                 | 1000.4646           | 1000.4668              | -2.25     |
|              | y 9                                 | 1160.4898           | 1160.4974              | -6.58     |
|              | y 11                                | 1376.5686           | 1376.5721              | -2.51     |
|              | y 12                                | 1475.6413           | 1475.6405              | 0.56      |
|              | y 13                                | 1589.6920           | 1589.6834              | 5.41      |
|              | y 14                                | 1676.7348           | 1676.7154              | 11.56     |
|              | y 15                                | 1733.7229           | 1733.7369              | -8.07     |
|              | y 16                                | 1880.7819           | 1880.8053              | -12.44    |
|              | y 17                                | 1993.8903           | 1993.8894              | 0.47      |
|              | y 18                                | 2130.9328           | 2130.9483              | -7.26     |
|              | y 13 + HexNAc                       | 1792.7394           | 1792.7628              | -13.03    |
|              | y 15 + HexNAc                       | 1936.7923           | 1936.8163              | -12.37    |
|              | y 16 + HexNAc                       | 2083.8646           | 2083.8847              | -9.63     |
|              | y 17 + HexNAc                       | 2196.9391           | 2196.9687              | -13.49    |
|              | b 2                                 | 257.1243            | 257.1244               | -0.51     |
|              | b 3                                 | 385.1803            | 385.1830               | -7.03     |
|              | b 4                                 | 522.2407            | 522.2419               | -2.34     |
|              | b 5                                 | 635.3231            | 635.3260               | -4.54     |
|              | b 6                                 | 782.3877            | 782.3944               | -8.56     |
|              | b 7                                 | 839.4083            | 839.4159               | -9.01     |
|              | b 8                                 | 926.4462            | 926.4479               | -1.82     |
|              | b 10                                | 1139.5543           | 1139.5592              | -4.33     |
|              | b 14                                | 1602.6965           | 1602.6965              | 0.02      |
|              | b 15                                | 1659.6991           | 1659.7179              | -11.35    |
|              | b 16                                | 1773.7555           | 1773.7609              | -3.02     |

|  |                                |           |           |        |
|--|--------------------------------|-----------|-----------|--------|
|  | b 19                           | 2193.9091 | 2193.9439 | -15.87 |
|  | b 14 + HexNAc                  | 1805.8077 | 1805.7758 | 17.64  |
|  | b 16 + HexNAc                  | 1976.8615 | 1976.8402 | 10.76  |
|  | b 17 + HexNAc                  | 2123.8766 | 2123.9086 | -15.09 |
|  | b 20 + HexNAc                  | 2544.0722 | 2544.0917 | -7.67  |
|  | Peptide                        | 2515.1150 | 2515.1240 | -3.58  |
|  | Peptide + HexNAc               | 2718.1838 | 2718.2034 | -7.20  |
|  |                                |           |           |        |
|  | possible backbone product ions | 20.0000   | % found   |        |
|  | y ions                         | 17.00     | 85%       |        |
|  | b ions                         | 14.00     | 70%       |        |

**Table S-3 (b) AGP glycopeptides tandem MS**

|              | <b>HILIC-C18</b>               |                     | <i>m/z</i>             | <i>z</i>  |
|--------------|--------------------------------|---------------------|------------------------|-----------|
| Glycopeptide | ENGTISR -[6,5,1,3,0]           |                     | 1261.8232              | 3+        |
| Peptide      | ENGTISR                        |                     |                        |           |
|              |                                | Observed <i>m/z</i> | Theoretical <i>m/z</i> | ppm error |
|              | y1                             | 175.1171            | 175.1190               | -10.57    |
|              | Peptide                        | 776.3774            | 776.3897               | -15.85    |
|              | Peptide + HexNAc               | 979.4687            | 979.4691               | -0.38     |
|              | Peptide + 2 HexNAc             | 1182.531            | 1182.5484              | -15.01    |
|              | Peptide + 2 HexNAc + 1 Hexose  | 1344.595            | 1344.6013              | -4.74     |
|              | Peptide + 2 HexNAc + 2 Hexose  | 1506.629            | 1506.6541              | -16.72    |
|              | Peptide + 3 HexNAc + 2 Hexose  | 1709.725            | 1709.7335              | -4.89     |
|              | Peptide + 3 HexNAc + 3 Hexose  | 1871.819            | 1871.7863              | 17.64     |
|              | Peptide + 3 HexNAc + 4 Hexose  | 2033.806            | 2033.8391              | -16.32    |
|              |                                |                     |                        |           |
|              | possible backbone product ions | 6                   | % found                |           |
|              | y ions                         | 1                   | 17%                    |           |
|              | b ions                         | 0                   | 0%                     |           |

|              | <b>HILIC-C18</b>              |                     | <i>m/z</i>             | <i>z</i>  |
|--------------|-------------------------------|---------------------|------------------------|-----------|
| Glycopeptide | ENGTVSR -[7,6,0,4,0]          |                     | 1070.6586              | 4+        |
| Peptide      | ENGTVSR                       |                     |                        |           |
|              |                               | Observed <i>m/z</i> | Theoretical <i>m/z</i> | ppm error |
|              | y1                            | 175.1156            | 175.1190               | -19.14    |
|              | y2                            | 262.1463            | 262.1510               | -17.85    |
|              | y3                            | 361.2136            | 361.2194               | -16.04    |
|              | y4                            | 462.2702            | 462.2671               | 6.77      |
|              | y5                            | 519.2827            | 519.2885               | -11.24    |
|              | y6 + HexNAc                   | 836.4216            | 836.4108               | 12.87     |
|              | b 2                           | 244.0891            | 244.0928               | -15.14    |
|              | b 6                           | 588.2632            | 588.2624               | 1.39      |
|              | b 6 + HexNAc                  | 791.3356            | 791.3418               | -7.77     |
|              | Peptide + HexNAc              | 965.4510            | 965.4534               | -2.51     |
|              | Peptide + 2 HexNAc            | 1168.5273           | 1168.5328              | -4.70     |
|              | Peptide + 2 HexNAc + 1 Hexose | 1330.5748           | 1330.5856              | -8.13     |
|              | Peptide + 2 HexNAc + 2 Hexose | 1492.6228           | 1492.6384              | -10.48    |
|              | Peptide + 3 HexNAc + 2 Hexose | 1695.7292           | 1695.7178              | 6.72      |
|              | Peptide + 3 HexNAc + 3 Hexose | 1857.7716           | 1857.7706              | 0.52      |

|  |                                |           |           |       |
|--|--------------------------------|-----------|-----------|-------|
|  | Peptide + 3 HexNAc + 4 Hexose  | 2019.8270 | 2019.8234 | 1.76  |
|  | Peptide + 4 HexNAc + 4 Hexose  | 2222.9048 | 2222.9028 | 0.89  |
|  | Peptide + 4 HexNAc + 5 Hexose  | 2384.9677 | 2384.9556 | 5.06  |
|  | Peptide + 5 HexNAc + 6 Hexose  | 2750.0792 | 2750.0878 | -3.14 |
|  |                                |           |           |       |
|  | possible backbone product ions | 6.0000    | % found   |       |
|  | y ions                         | 6.00      | 100%      |       |
|  | b ions                         | 2.00      | 33%       |       |

|              | <b>HILIC-C18</b>                       |                     | <i>m/z</i>             | <i>z</i>  |
|--------------|----------------------------------------|---------------------|------------------------|-----------|
| Glycopeptide | SVQEIQATFFYFTPKNKTEDTIFLR -[7,6,0,4,0] |                     | 1283.342               | 5+        |
| Peptide      | SVQEIQATFFYFTPKNKTEDTIFLR              |                     |                        |           |
|              |                                        | Observed <i>m/z</i> | Theoretical <i>m/z</i> | ppm error |
|              | y1                                     | 175.1179            | 175.1190               | -6.01     |
|              | y3                                     | 435.2684            | 435.2714               | -6.96     |
|              | y4                                     | 548.3481            | 548.3555               | -13.48    |
|              | y5                                     | 649.4017            | 649.4032               | -2.27     |
|              | y6                                     | 764.4272            | 764.4301               | -3.81     |
|              | y7                                     | 893.4661            | 893.4727               | -7.40     |
|              | y8                                     | 994.5176            | 994.5204               | -2.80     |
|              | y9                                     | 1122.6098           | 1122.6154              | -4.94     |
|              | y 12                                   | 1434.737            | 1434.759               | -15.21    |
|              | y 15                                   | 1891.949            | 1891.959               | -5.43     |
|              | y11 + HexNAc                           | 1536.7857           | 1536.7904              | -3.07     |
|              | y12 + HexNAc                           | 1637.8186           | 1637.8381              | -11.90    |
|              | y13 + HexNAc                           | 1784.9000           | 1784.9065              | -3.64     |
|              | y14 + HexNAc                           | 1947.9796           | 1947.9698              | 5.01      |
|              | y15 + HexNAc                           | 2095.0210           | 2095.0382              | -8.23     |
|              | y16 + HexNAc                           | 2242.0876           | 2242.1067              | -8.50     |
|              | y17 + HexNAc                           | 2343.1460           | 2343.1543              | -3.56     |
|              | y18 + HexNAc                           | 2414.1482           | 2414.1915              | -17.92    |
|              | y19 + HexNAc                           | 2542.2279           | 2542.2500              | -8.71     |
|              | b 3                                    | 315.1638            | 315.1663               | -7.92     |
|              | b 4                                    | 444.2078            | 444.2089               | -2.45     |
|              | b 5                                    | 557.2905            | 557.293                | -4.40     |
|              | b 6                                    | 685.3449            | 685.3515               | -9.67     |
|              | b 7                                    | 756.3854            | 756.3886               | -4.29     |
|              | b 8                                    | 857.4299            | 857.4363               | -7.49     |
|              | b 9                                    | 1004.5              | 1004.505               | -4.52     |
|              | b 10                                   | 1151.569            | 1151.573               | -3.87     |
|              | b 11                                   | 1314.627            | 1314.636               | -7.36     |



|  |               |          |          |       |
|--|---------------|----------|----------|-------|
|  | b 12          | 1461.693 | 1461.705 | -8.41 |
|  | b 13          | 1562.771 | 1562.753 | 11.92 |
|  | b 16          | 1901.937 | 1901.943 | -3.38 |
|  | b 17          | 2002.998 | 2002.991 | 3.49  |
|  | b 17 + HexNAc | 2206.073 | 2206.07  | 1.37  |
|  | b 19          | 2247.057 | 2247.06  | -1.35 |
|  | b 22          | 2608.314 | 2608.261 | 20.28 |
|  | b 21 + HexNAc | 2664.25  | 2664.272 | -8.24 |

|              | <b>HILIC-C18</b>               |                     | <i>m/z</i>             | <i>z</i>  |
|--------------|--------------------------------|---------------------|------------------------|-----------|
| Glycopeptide | ENGTISR -[7,6,0,4,0]           |                     | 1074.163               | 4+        |
| Peptide      | ENGTISR                        |                     |                        |           |
|              |                                | Observed <i>m/z</i> | Theoretical <i>m/z</i> | ppm error |
|              | y1                             | 175.1166            | 175.1190               | -13.43    |
|              | y2                             | 262.1497            | 262.1510               | -4.88     |
|              | y3                             | 375.2352            | 375.2350               | 0.42      |
|              | y4                             | 476.2769            | 476.2827               | -12.23    |
|              | y5                             | 533.3041            | 533.3042               | -0.16     |
|              | y6 + HexNAc                    | 850.4158            | 850.4265               | -12.56    |
|              | b 3                            | 301.1078            | 301.1143               | -21.46    |
|              | b 4                            | 402.1574            | 402.1619               | -11.29    |
|              | b 5                            | 515.2479            | 515.246                | 3.68      |
|              | b 6                            | 602.2772            | 602.278                | -1.38     |
|              | b 6 + HexNAc                   | 805.366             | 805.3574               | 10.68     |
|              | Peptide                        | 776.3906            | 776.3897               | 1.15      |
|              | Peptide + HexNAc               | 979.4676            | 979.4691               | -1.51     |
|              | Peptide + 2 HexNAc             | 1182.5475           | 1182.5484              | -0.80     |
|              | Peptide + 2 HexNAc + 1 Hexose  | 1344.5997           | 1344.6013              | -1.17     |
|              | Peptide + 2 HexNAc + 2 Hexose  | 1506.6562           | 1506.6541              | 1.40      |
|              | Peptide + 2 HexNAc + 3 Hexose  | 1668.7097           | 1668.7069              | 1.67      |
|              | Peptide + 3 HexNAc + 2 Hexose  | 1709.7472           | 1709.7335              | 8.04      |
|              | Peptide + 3 HexNAc + 3 Hexose  | 1871.7838           | 1871.7863              | -1.32     |
|              | Peptide + 3 HexNAc + 4 Hexose  | 2033.8299           | 2033.8391              | -4.52     |
|              | Peptide + 4 HexNAc + 3 Hexose  | 2074.8703           | 2074.8656              | 2.24      |
|              | Peptide + 4 HexNAc + 4 Hexose  | 2236.9040           | 2236.9185              | -6.47     |
|              | Peptide + 4 HexNAc + 5 Hexose  | 2398.9753           | 2398.9713              | 1.67      |
|              |                                |                     |                        |           |
|              | possible backbone product ions | 6.0000              | % found                |           |
|              | y ions                         | 6.00                | 100%                   |           |

|  |        |      |     |  |
|--|--------|------|-----|--|
|  | b ions | 5.00 | 80% |  |
|  |        |      |     |  |

|              | <b>HILIC-C18</b>               |                     | <i>m/z</i>             | <i>z</i>  |
|--------------|--------------------------------|---------------------|------------------------|-----------|
| Glycopeptide | NEEYNK -[5,4,0,2,0]            |                     | 751.0409               | 4+        |
| Peptide      | NEEYNK                         |                     |                        |           |
|              |                                | Observed <i>m/z</i> | Theoretical <i>m/z</i> | ppm error |
|              | y 1                            | 147.1106            | 147.1128               | -14.98    |
|              | y 2                            | 261.1545            | 261.1557               | -4.71     |
|              | y 4                            | 553.2545            | 553.2617               | -12.93    |
|              | y 5                            | 682.2981            | 682.3042               | -9.01     |
|              | y2 + HexNAc                    | 464.2350            | 464.2351               | -0.22     |
|              | y3 + HexNAc                    | 627.2983            | 627.2984               | -0.21     |
|              | y4 + HexNAc                    | 756.3386            | 756.3410               | -3.20     |
|              | y5 + HexNAc                    | 885.4005            | 885.3836               | 19.07     |
|              | b 2                            | 244.0916            | 244.0928               | -4.90     |
|              | b 3                            | 373.1330            | 373.1354               | -6.40     |
|              | b 4                            | 536.1947            | 536.1987               | -7.49     |
|              | b 5                            | 650.2396            | 650.2416               | -3.15     |
|              | Peptide                        | 796.3435            | 796.3472               | -4.61     |
|              | Peptide + HexNAc               | 999.4290            | 999.4265               | 2.46      |
|              | Peptide + 2 HexNAc             | 1202.5052           | 1202.5059              | -0.59     |
|              | Peptide + 2 HexNAc + 1 Hexose  | 1364.5526           | 1364.5587              | -4.49     |
|              | Peptide + 2 HexNAc + 2 Hexose  | 1526.6189           | 1526.612               | 4.81      |
|              | Peptide + 2 HexNAc + 3 Hexose  | 1688.6578           | 1688.664               | -3.89     |
|              |                                |                     |                        |           |
|              | possible backbone product ions | 5.0000              | % found                |           |
|              | y ions                         | 5.00                | 100%                   |           |
|              | b ions                         | 4.00                | 80%                    |           |

|              | <b>HILIC-C18</b>               |                     | <i>m/z</i>             | <i>z</i>  |
|--------------|--------------------------------|---------------------|------------------------|-----------|
| Glycopeptide | QDQCIYNTTYLNVQR -[6,5,0,3,0]   |                     | 1194.9868              | 4+        |
| Peptide      | QDQCIYNTTYLNVQR                |                     |                        |           |
|              |                                | Observed <i>m/z</i> | Theoretical <i>m/z</i> | ppm error |
|              | y1                             | 175.1181            | 175.1190               | -4.86     |
|              | y2                             | 303.1769            | 303.1775               | -2.08     |
|              | y3                             | 402.2440            | 402.2459               | -4.83     |
|              | y4                             | 516.2902            | 516.2889               | 2.57      |
|              | y5                             | 629.3707            | 629.3729               | -3.55     |
|              | y6                             | 792.4355            | 792.4363               | -0.96     |
|              | y7                             | 893.4851            | 893.4839               | 1.30      |
|              | y8                             | 994.5241            | 994.5316               | -7.56     |
|              | y 10                           | 1271.6305           | 1271.6379              | -5.80     |
|              | y 13                           | 1672.8007           | 1672.8111              | -6.22     |
|              | y 14                           | 1787.8318           | 1787.8380              | -3.49     |
|              | y9 + HexNAc                    | 1311.6511           | 1311.6539              | -2.15     |
|              | y10 + HexNAc                   | 1474.7142           | 1474.7172              | -2.07     |
|              | y11 + HexNAc                   | 1587.8195           | 1587.8013              | 11.46     |
|              | y12 + HexNAc                   | 1747.8614           | 1747.8319              | 16.88     |
|              | y14 + HexNAc                   | 1990.8979           | 1990.9174              | -9.80     |
|              | b 3                            | 372.1489            | 372.1514               | -6.65     |
|              | b 4                            | 532.1782            | 532.1820               | -7.06     |
|              | b 5                            | 645.2666            | 645.2660               | 0.89      |
|              | b 6                            | 808.3357            | 808.3294               | 7.85      |
|              | b 8                            | 1023.4065           | 1023.4200              | -13.15    |
|              | b 9                            | 1124.4473           | 1124.4676              | -18.09    |
|              | b 10                           | 1287.5057           | 1287.5310              | -19.62    |
|              | b 11                           | 1400.5907           | 1400.6150              | -17.37    |
|              | b 10 + HexNAc                  | 1490.5931           | 1490.6103              | -11.56    |
|              | Peptide + HexNAc               | 2118.9728           | 2118.9760              | -1.51     |
|              | Peptide + 2 HexNAc             | 2322.0571           | 2322.0554              | 0.75      |
|              | Peptide + 2 HexNAc + 1 Hexose  | 2484.0972           | 2484.1082              | -4.42     |
|              | Peptide + 2 HexNAc + 2 Hexose  | 2646.1560           | 2646.1610              | -1.89     |
|              | Peptide + 2 HexNAc + 3 Hexose  | 2808.1819           | 2808.2138              | -11.37    |
|              |                                |                     |                        |           |
|              | possible backbone product ions | 14.0000             | % found                |           |
|              | y ions                         | 14.00               | 100%                   |           |
|              | b ions                         | 8.00                | 57%                    |           |

|              | <b>C18</b>                     |                     | <i>m/z</i>             | <i>z</i>  |
|--------------|--------------------------------|---------------------|------------------------|-----------|
| Glycopeptide | QDQCIYNTTYLNVQR -[6,5,0,3,0]   |                     | 1194.9868              | 4+        |
| Peptide      | QDQCIYNTTYLNVQR                |                     |                        |           |
|              |                                | Observed <i>m/z</i> | Theoretical <i>m/z</i> | ppm error |
|              | y1                             | 175.1194            | 175.1190               | 2.56      |
|              | y4                             | 516.2955            | 516.2889               | 12.84     |
|              | y6                             | 792.4377            | 792.4363               | 1.81      |
|              | y7                             | 893.4122            | 893.4839               | -80.30    |
|              | y9 + HexNAc                    | 1311.6352           | 1311.6539              | -14.27    |
|              | y10 + HexNAc                   | 1474.0000           | 1474.7172              | -486.60   |
|              | b 3                            | 372.1529            | 372.1514               | 4.10      |
|              | b 5                            | 645.2644            | 645.2660               | -2.51     |
|              | Peptide                        | 1915.9015           | 1915.8966              | 2.55      |
|              | Peptide + HexNAc               | 2118.9607           | 2118.9760              | -7.22     |
|              |                                |                     |                        |           |
|              | possible backbone product ions | 14.0000             | % found                |           |
|              | y ions                         | 6.00                | 43%                    |           |
|              | b ions                         | 2.00                | 14%                    |           |

|              | <b>HILIC-C18</b>              |                     |                        |           |
|--------------|-------------------------------|---------------------|------------------------|-----------|
|              |                               | <i>m/z</i>          | <i>z</i>               |           |
| Glycopeptide | SVQEIQATFFYFTPDK -[7,6,0,4,0] | 1088.2441           | 5+                     |           |
| Peptide      | SVQEIQATFFYFTPDK              |                     |                        |           |
|              |                               | Observed <i>m/z</i> | Theoretical <i>m/z</i> | ppm error |
|              | y1                            | 147.1125            | 147.1128               | -2.06     |
|              | y2                            | 261.1519            | 261.1557               | -14.67    |
|              | y3                            | 358.2063            | 358.2085               | -6.13     |
|              | y4                            | 459.2487            | 459.2562               | -16.27    |
|              | y5                            | 606.3179            | 606.3246               | -11.03    |
|              | y6                            | 769.3798            | 769.3879               | -10.55    |
|              | y7                            | 916.4518            | 916.4563               | -4.94     |
|              | y8                            | 1063.5147           | 1063.5247              | -9.44     |
|              | y9                            | 1164.5832           | 1164.5724              | 9.25      |
|              | y10                           | 1235.5985           | 1235.6095              | -8.93     |
|              | y11                           | 1363.6637           | 1363.6681              | -3.24     |
|              | y12                           | 1476.7234           | 1476.7522              | -19.49    |
|              | y13                           | 1605.7993           | 1605.7948              | 2.82      |

|  |                                |           |           |        |
|--|--------------------------------|-----------|-----------|--------|
|  | y3 + HexNAc                    | 561.2845  | 561.28787 | -6.00  |
|  | y4 + HexNAc                    | 662.3326  | 662.33554 | -4.44  |
|  | y5 + HexNAc                    | 809.4062  | 809.40396 | 2.77   |
|  | y6 + HexNAc                    | 972.4679  | 972.46729 | 0.63   |
|  | y7 + HexNAc                    | 1119.5267 | 1119.5357 | -8.04  |
|  | y8 + HexNAc                    | 1266.6004 | 1266.6041 | -2.93  |
|  | y9 + HexNAc                    | 1367.6379 | 1367.6518 | -10.16 |
|  | y10 + HexNAc                   | 1438.6860 | 1438.6889 | -2.02  |
|  | y11 + HexNAc                   | 1566.7448 | 1566.7475 | -1.71  |
|  | y12 + HexNAc                   | 1679.8491 | 1679.8315 | 10.45  |
|  | y14 + HexNAc                   | 1936.9112 | 1936.9327 | -11.11 |
|  | b 3                            | 315.1646  | 315.1663  | -5.38  |
|  | b 4                            | 444.2048  | 444.2089  | -9.21  |
|  | b 5                            | 557.2930  | 557.2930  | 0.08   |
|  | b 6                            | 685.3473  | 685.3515  | -6.17  |
|  | b 7                            | 756.3911  | 756.3886  | 3.25   |
|  | b 8                            | 857.4334  | 857.4363  | -3.41  |
|  | b 9                            | 1004.4931 | 1004.5047 | -11.58 |
|  | b 10                           | 1151.5640 | 1151.5732 | -7.95  |
|  | b 11                           | 1314.6423 | 1314.6365 | 4.43   |
|  | b 12                           | 1461.6989 | 1461.7049 | -4.10  |
|  | b 13                           | 1562.7397 | 1562.7526 | -8.24  |
|  | b 15                           | 1773.8266 | 1773.8483 | -12.21 |
|  | Peptide                        | 1919.9542 | 1919.9538 | 0.21   |
|  | Peptide + HexNAc               | 2123.0217 | 2123.0332 | -5.40  |
|  | Peptide + 2 HexNAc             | 2326.0847 | 2326.1125 | -11.96 |
|  | Peptide + 2 HexNAc + Hexose    | 2488.1914 | 2488.1654 | 10.47  |
|  | Peptide + 2 HexNAc + 2 Hexose  | 2650.2004 | 2650.2182 | -6.71  |
|  | Peptide + 2 HexNAc + 3 Hexose  | 2812.2723 | 2812.2710 | 0.47   |
|  |                                |           |           |        |
|  | possible backbone product ions | 15.0000   | % found   |        |
|  | y ions                         | 14.00     | 93%       |        |
|  | b ions                         | 12.00     | 80%       |        |

**Table S-3 (c) Hemagglutinin glycopeptides tandem MS**

|              | <b>HILIC-C18</b>               |                     |                        |           |
|--------------|--------------------------------|---------------------|------------------------|-----------|
|              |                                |                     | <i>m/z</i>             | <i>z</i>  |
| Glycopeptide | NGSYPNLSK-[5,4,1,1,0]          |                     | 1013.7474              | 3         |
| Peptide      | NGSYPNLSK                      |                     |                        |           |
|              |                                | Observed <i>m/z</i> | Theoretical <i>m/z</i> | ppm error |
|              | y 2                            | 234.144             | 234.145                | -3.55     |
|              | b 3                            | 259.102             | 259.104                | -7.32     |
|              | y 3                            | 347.228             | 347.229                | -1.43     |
|              | b 4                            | 422.162             | 422.167                | -12.61    |
|              | y 4                            | 461.268             | 461.272                | -8.51     |
|              | b 5                            | 519.216             | 519.220                | -7.68     |
|              | y 5                            | 558.324             | 558.325                | -1.05     |
|              | y 6                            | 721.386             | 721.388                | -2.10     |
|              | b 7                            | 746.345             | 746.347                | -2.52     |
|              | y 5 + HexNAc                   | 761.402             | 761.404                | -3.23     |
|              | y 7                            | 808.420             | 808.420                | 0.19      |
|              | b 8                            | 833.380             | 833.379                | 0.95      |
|              | y 8                            | 865.440             | 865.441                | -1.97     |
|              | y 6 + HexNAc                   | 924.461             | 924.467                | -7.02     |
|              | b 7 + HexNAc                   | 949.425             | 949.426                | -1.21     |
|              | protonated peptide             | 979.483             | 979.484                | -1.57     |
|              | y 7 + HexNAc                   | 1011.500            | 1011.499               | 0.48      |
|              | b 8 + HexNAc                   | 1036.468            | 1036.458               | 9.67      |
|              | y 8 + HexNAc                   | 1068.521            | 1068.521               | -0.17     |
|              | peptide + HexNAc               | 1182.563            | 1182.564               | -0.35     |
|              | peptide + HexNAc2              | 1385.639            | 1385.643               | -3.31     |
|              | peptide + HexNAc2 + Hex        | 1547.686            | 1547.696               | -6.40     |
|              | peptide + HexNAc2 + Hex2       | 1709.747            | 1709.749               | -1.19     |
|              | peptide + HexNAc2 + Hex3       | 1871.791            | 1871.802               | -5.80     |
|              |                                |                     |                        |           |
|              | possible backbone product ions | 8                   | % found                |           |
|              | y ions                         | 7                   | 88%                    |           |
|              | b ions                         | 5                   | 63%                    |           |

|              | <b>HILIC-C18</b>                           |                     |                        |           |
|--------------|--------------------------------------------|---------------------|------------------------|-----------|
|              |                                            |                     | <i>m/z</i>             | <i>z</i>  |
| Glycopeptide | NVTVTHSVNLLEDShN(deamidated)GK-[7,6,1,3,0] |                     | 1068.2338              | 5+        |
| Peptide      | NVTVTHSVNLLEDShN(deamidated)GK             |                     |                        |           |
|              |                                            | Observed <i>m/z</i> | Theoretical <i>m/z</i> | ppm error |
|              | y 1                                        | 147.1108            | 147.1128               | -13.62    |
|              | b 2                                        | 214.1160            | 214.1186               | -12.22    |
|              | b 3                                        | 315.1644            | 315.1663               | -6.02     |
|              | y 3                                        | 319.1585            | 319.1612               | -8.48     |
|              | b 4                                        | 414.2260            | 414.2347               | -21.03    |
|              | b 2 + HexNAc                               | 417.1999            | 417.1980               | 4.58      |
|              | y 4                                        | 456.2186            | 456.2201               | -3.32     |
|              | b 5                                        | 515.2763            | 515.2824               | -11.82    |
|              | b 3 + HexNAc                               | 518.2476            | 518.2457               | 3.73      |
|              | y 5                                        | 543.2487            | 543.2521               | -6.34     |
|              | b 4 + HexNAc                               | 617.3090            | 617.3141               | -8.23     |
|              | b 6                                        | 652.3321            | 652.3413               | -14.10    |
|              | y 6                                        | 658.2612            | 658.2791               | -27.18    |
|              | b 7                                        | 739.3668            | 739.3733               | -8.83     |
|              | y 7                                        | 787.3161            | 787.3217               | -7.09     |
|              | b 8                                        | 838.4354            | 838.4417               | -7.56     |
|              | b 6 + HexNAc                               | 855.4139            | 855.4207               | -7.91     |
|              | y 8                                        | 900.4005            | 900.4057               | -5.83     |
|              | b 7 + HexNAc                               | 942.4532            | 942.4527               | 0.53      |
|              | b 9                                        | 952.4850            | 952.4847               | 0.35      |
|              | y 9                                        | 1013.4791           | 1013.4898              | -10.57    |
|              | b 10                                       | 1065.5609           | 1065.5687              | -7.35     |
|              | y 10                                       | 1127.5267           | 1127.5327              | -5.35     |
|              | b 9 + HexNAc                               | 1155.5530           | 1155.5640              | -9.55     |
|              | y 11                                       | 1226.5983           | 1226.6012              | -2.32     |
|              | b 12                                       | 1307.6857           | 1307.6954              | -7.41     |
|              | y 12                                       | 1313.6227           | 1313.6332              | -7.98     |
|              | b 11 + HexNAc                              | 1381.7250           | 1381.7322              | -5.19     |
|              | b 13                                       | 1422.7126           | 1422.7223              | -6.84     |
|              | y 13                                       | 1450.6695           | 1450.6921              | -15.57    |
|              | b 12 + HexNAc                              | 1510.7657           | 1510.7748              | -6.00     |
|              | y 14                                       | 1551.7295           | 1551.7398              | -6.62     |
|              | b 13 + HexNAc                              | 1625.7885           | 1625.8017              | -8.12     |
|              | b 15                                       | 1646.8039           | 1646.8133              | -5.69     |
|              | y 15                                       | 1650.7778           | 1650.8082              | -18.41    |
|              | y 16                                       | 1751.8259           | 1751.8559              | -17.10    |

|  |                                |           |           |        |
|--|--------------------------------|-----------|-----------|--------|
|  | b 16                           | 1761.8224 | 1761.8402 | -10.11 |
|  | b 17                           | 1818.8291 | 1818.8617 | -17.91 |
|  | b 15 + HexNAc                  | 1849.8810 | 1849.8926 | -6.29  |
|  | protonated peptide             | 1964.9563 | 1964.9672 | -5.55  |
|  | b 17 + HexNAc                  | 2021.9255 | 2021.9410 | -7.69  |
|  | peptide + HexNAc               | 2168.0326 | 2168.0466 | -6.45  |
|  | peptide + HexNAc2              | 2371.0991 | 2371.1259 | -11.32 |
|  | peptide + HexNAc2 + Hex        | 2533.1436 | 2533.1788 | -13.88 |
|  | peptide + HexNAc2 + Hex2       | 2695.2083 | 2695.2316 | -8.64  |
|  |                                |           |           |        |
|  | possible backbone product ions | 17        | % found   |        |
|  | y ions                         | 15        | 88%       |        |
|  | b ions                         | 15        | 88%       |        |

|              | <b>HILIC-C18</b>                |                     |                        |           |
|--------------|---------------------------------|---------------------|------------------------|-----------|
|              |                                 |                     | <i>m/z</i>             | <i>z</i>  |
| Glycopeptide | GFGSGIITSNASMDECDTK-[7,6,1,3,0] |                     | 1341.2684              | 4+        |
| Peptide      | GFGSGIITSNASMDECDTK             |                     |                        |           |
|              |                                 | Observed <i>m/z</i> | Theoretical <i>m/z</i> | ppm error |
|              | y 1                             | 147.1112            | 147.1128               | -10.90    |
|              | y 2                             | 248.1607            | 248.1605               | 0.88      |
|              | b 4                             | 349.1444            | 349.1506               | -17.89    |
|              | y 3                             | 363.1841            | 363.1874               | -9.16     |
|              | b 5                             | 406.1701            | 406.1721               | -4.95     |
|              | y 4                             | 523.2146            | 523.2180               | -6.52     |
|              | b 7                             | 632.3387            | 632.3402               | -2.43     |
|              | y 5                             | 652.2580            | 652.2606               | -3.99     |
|              | b 8                             | 733.3841            | 733.3879               | -5.20     |
|              | y 6                             | 767.2845            | 767.2875               | -3.97     |
|              | b 9                             | 820.4112            | 820.4199               | -10.66    |
|              | y 7                             | 898.3257            | 898.3280               | -2.59     |
|              | b 10                            | 934.4526            | 934.4629               | -10.99    |
|              | y 8                             | 985.3553            | 985.3601               | -4.83     |
|              | b 11                            | 1005.4953           | 1005.5000              | -4.66     |
|              | y 9                             | 1056.3950           | 1056.3972              | -2.06     |
|              | y 10                            | 1170.4369           | 1170.4401              | -2.73     |
|              | b 13                            | 1223.5647           | 1223.5725              | -6.37     |
|              | y 11                            | 1257.4641           | 1257.4721              | -6.38     |
|              | b 14                            | 1338.5923           | 1338.5994              | -5.34     |
|              | y 12                            | 1358.5220           | 1358.5198              | 1.61      |
|              | y 10 + HexNAc                   | 1373.5205           | 1373.5195              | 0.75      |



|  |                                |           |           |        |
|--|--------------------------------|-----------|-----------|--------|
|  | y 11 + HexNAc                  | 1460.5441 | 1460.5515 | -5.07  |
|  | b 15                           | 1467.6255 | 1467.6420 | -11.27 |
|  | y 13                           | 1471.6009 | 1471.6039 | -2.02  |
|  | b 14 + HexNAc                  | 1541.6727 | 1541.6788 | -3.96  |
|  | y 12 + HexNAc                  | 1561.5898 | 1561.5992 | -6.01  |
|  | y 15                           | 1641.6838 | 1641.7094 | -15.59 |
|  | b 15 + HexNAc                  | 1670.6899 | 1670.7214 | -18.86 |
|  | y 13 + HexNAc                  | 1674.6863 | 1674.6832 | 1.83   |
|  | b 17                           | 1742.7083 | 1742.6996 | 5.01   |
|  | y 17                           | 1785.7645 | 1785.7629 | 0.90   |
|  | b 17 + HexNAc                  | 1945.7675 | 1945.7789 | -5.88  |
|  | protonated peptide             | 1989.8460 | 1989.8528 | -3.40  |
|  | peptide + HexNAc               | 2192.9244 | 2192.9321 | -3.53  |
|  | peptide + HexNAc2              | 2395.9952 | 2396.0115 | -6.81  |
|  | peptide + HexNAc2 + Hex        | 2558.0484 | 2558.0643 | -6.23  |
|  | peptide + HexNAc2 + Hex2       | 2720.1064 | 2720.1172 | -3.96  |
|  | peptide + HexNAc2 + Hex3       | 2882.1538 | 2882.1700 | -5.62  |
|  |                                |           |           |        |
|  | possible backbone product ions | 18        | % found   |        |
|  | y ions                         | 15        | 83%       |        |
|  | b ions                         | 11        | 61%       |        |

|              | <b>HILIC-C18</b>                          |                     |                        |           |
|--------------|-------------------------------------------|---------------------|------------------------|-----------|
|              |                                           |                     | <i>m/z</i>             | <i>z</i>  |
| Glycopeptide | SWSYIAETPNSSENGTCYPGYFADYEELR-[7,6,1,3,0] |                     | 1339.127               | 5+        |
| Peptide      | SWSYIAETPNSSENGTCYPGYFADYEELR             |                     |                        |           |
|              |                                           | Observed <i>m/z</i> | Theoretical <i>m/z</i> | ppm error |
|              | b 10                                      | 1149.5089           | 1149.5211              | -10.63    |
|              | b 12                                      | 1365.5856           | 1365.5957              | -7.42     |
|              | b 13                                      | 1479.6185           | 1479.6387              | -13.63    |
|              | b 15                                      | 1637.6754           | 1637.7078              | -19.79    |
|              | b 16                                      | 1797.7078           | 1797.7384              | -17.02    |
|              | b 17                                      | 1960.7803           | 1960.8017              | -10.92    |
|              | b 17 + HexNAc                             | 2163.8944           | 2163.8811              | 6.15      |
|              | b 18                                      | 2057.8461           | 2057.8545              | -4.07     |
|              | b 18 + HexNAc                             | 2260.8985           | 2260.9339              | -15.64    |
|              | b 20                                      | 2277.9413           | 2277.9393              | 0.89      |
|              | b 20 + HexNAc                             | 2481.0215           | 2481.0186              | 1.15      |
|              | b 23                                      | 2611.0396           | 2611.0717              | -12.31    |

|  |                                |           |           |        |
|--|--------------------------------|-----------|-----------|--------|
|  | b 3                            | 361.1484  | 361.1506  | -6.22  |
|  | b 4                            | 524.2118  | 524.2140  | -4.15  |
|  | b 5                            | 637.2929  | 637.2980  | -8.06  |
|  | b 6                            | 708.3242  | 708.3352  | -15.46 |
|  | b 7                            | 837.3693  | 837.3777  | -10.09 |
|  | b 8                            | 938.4152  | 938.4254  | -10.89 |
|  | b 9                            | 1035.4623 | 1035.4782 | -15.34 |
|  | y 1                            | 175.1170  | 175.1190  | -11.15 |
|  | y 10                           | 1262.5528 | 1262.5688 | -12.67 |
|  | y 11                           | 1359.6107 | 1359.6216 | -7.99  |
|  | y 12                           | 1522.6688 | 1522.6849 | -10.56 |
|  | y 13                           | 1682.6928 | 1682.7155 | -13.47 |
|  | y 14                           | 1783.7462 | 1783.7631 | -9.50  |
|  | y 15                           | 1840.7661 | 1840.7846 | -10.06 |
|  | y 16 + HexNAc                  | 2157.8850 | 2157.9069 | -10.15 |
|  | y 17                           | 2083.8732 | 2083.8701 | 1.47   |
|  | y 17 + HexNAc                  | 2286.9058 | 2286.9495 | -19.11 |
|  | y 18                           | 2170.8698 | 2170.9022 | -14.91 |
|  | y 18 + HexNAc                  | 2373.9678 | 2373.9815 | -5.78  |
|  | y 2                            | 288.1998  | 288.2030  | -11.16 |
|  | y 20                           | 2381.9667 | 2381.9979 | -13.08 |
|  | y 20 + HexNAc                  | 2585.0541 | 2585.0772 | -8.95  |
|  | y 21 + HexNAc                  | 2686.0805 | 2686.1249 | -16.53 |
|  | y 22 + HexNAc                  | 2815.1257 | 2815.1675 | -14.85 |
|  | y 23 + HexNAc                  | 2886.1594 | 2886.2046 | -15.66 |
|  | y 3                            | 417.2411  | 417.2456  | -10.81 |
|  | y 4                            | 546.2830  | 546.2882  | -9.52  |
|  | y 5                            | 709.3451  | 709.3515  | -9.07  |
|  | y 6                            | 824.3718  | 824.3785  | -8.10  |
|  | y 7                            | 895.4076  | 895.4156  | -8.92  |
|  | y 8                            | 1042.4747 | 1042.4840 | -8.92  |
|  | y 9                            | 1205.5335 | 1205.5473 | -11.47 |
|  |                                |           |           |        |
|  | possible backbone product ions | 27        | % found   |        |
|  | y ions                         | 22        | 81%       |        |
|  | b ions                         | 16        | 59%       |        |

| HILIC-C18    |                                 |                     |                        |           |
|--------------|---------------------------------|---------------------|------------------------|-----------|
|              |                                 |                     | <i>m/z</i>             | <i>z</i>  |
| Glycopeptide | GFGSGIITSNASMDECDTK-[7,6,1,4,0] |                     | 1131.439               | 5+        |
| Peptide      | GFGSGIITSNASMDECDTK             |                     |                        |           |
|              |                                 | Observed <i>m/z</i> | Theoretical <i>m/z</i> | ppm error |
|              | y 1                             | 147.1114            | 147.1128               | -9.54     |
|              | y 2                             | 248.1593            | 248.1605               | -4.76     |
|              | b 3                             | 262.1139            | 262.1186               | -18.00    |
|              | y 3                             | 363.1923            | 363.1874               | 13.42     |
|              | b 5                             | 406.1687            | 406.1721               | -8.39     |
|              | b 6                             | 519.2523            | 519.2562               | -7.46     |
|              | y 4                             | 523.2129            | 523.2180               | -9.77     |
|              | b 7                             | 632.3330            | 632.3402               | -11.45    |
|              | y 5                             | 652.2550            | 652.2606               | -8.59     |
|              | b 8                             | 733.3783            | 733.3879               | -13.11    |
|              | y 6                             | 767.2883            | 767.2875               | 0.98      |
|              | b 9                             | 820.4057            | 820.4199               | -17.36    |
|              | y 7                             | 898.3219            | 898.3280               | -6.82     |
|              | b 10                            | 934.4490            | 934.4629               | -14.85    |
|              | y 8                             | 985.3582            | 985.3601               | -1.89     |
|              | b 11                            | 1005.4944           | 1005.5000              | -5.56     |
|              | y 9                             | 1056.3900           | 1056.3972              | -6.79     |
|              | b 12                            | 1092.5222           | 1092.5320              | -8.98     |
|              | y 10                            | 1170.4517           | 1170.4401              | 9.91      |
|              | b 13                            | 1223.5887           | 1223.5725              | 13.24     |
|              | y 11                            | 1257.4770           | 1257.4721              | 3.87      |
|              | y 12                            | 1358.5045           | 1358.5198              | -11.27    |
|              | y 11 + HexNAc                   | 1460.5428           | 1460.5515              | -5.96     |
|              | b 14 + HexNAc                   | 1541.6670           | 1541.6788              | -7.66     |
|              | y 12 + HexNAc                   | 1561.6034           | 1561.5992              | 2.70      |
|              | b 17                            | 1742.7077           | 1742.6996              | 4.67      |
|              | y 15 + HexNAc                   | 1844.8194           | 1844.7888              | 16.60     |
|              | y 18                            | 1932.8149           | 1932.8313              | -8.49     |
|              | protonated peptide              | 1989.8438           | 1989.8528              | -4.51     |
|              | y 18 + HexNAc                   | 2135.8829           | 2135.9107              | -13.00    |
|              | peptide + HexNAc                | 2192.9191           | 2192.9321              | -5.95     |
|              | peptide + HexNAc2 + Hex3        | 2882.1268           | 2882.1700              | -14.98    |
|              |                                 |                     |                        |           |
|              | possible backbone product ions  | 18                  | % found                |           |
|              | y ions                          | 14                  | 78%                    |           |
|              | b ions                          | 12                  | 67%                    |           |

|              | <b>C18</b>                     |                     |                        |           |
|--------------|--------------------------------|---------------------|------------------------|-----------|
|              |                                |                     | <i>m/z</i>             | <i>z</i>  |
| Glycopeptide | NGSYPNLSK-[5,4,1,1,0]          |                     | 1013.7467              | 3         |
| Peptide      | NGSYPNLSK                      |                     |                        |           |
|              |                                | Observed <i>m/z</i> | Theoretical <i>m/z</i> | ppm error |
|              | y 1                            | 147.1099            | 147.1128               | -19.74    |
|              | y 2                            | 234.1424            | 234.1448               | -10.39    |
|              | b 3                            | 259.1000            | 259.1037               | -14.26    |
|              | y 3                            | 347.2262            | 347.2289               | -7.77     |
|              | b 4                            | 422.1643            | 422.1670               | -6.45     |
|              | y 4                            | 461.2676            | 461.2718               | -9.16     |
|              | y 5                            | 558.3236            | 558.3246               | -1.77     |
|              | b 6                            | 633.2524            | 633.2627               | -16.29    |
|              | y 6                            | 721.3859            | 721.3879               | -2.79     |
|              | b 7                            | 746.3444            | 746.3468               | -3.19     |
|              | y 7                            | 808.4163            | 808.4199               | -4.51     |
|              | b 8                            | 833.3797            | 833.3788               | 1.07      |
|              | y 8                            | 865.4392            | 865.4414               | -2.55     |
|              | protonated peptide             | 979.4823            | 979.4843               | -2.08     |
|              | peptide + HexNAc               | 1182.5622           | 1182.5637              | -1.28     |
|              | peptide + HexNAc2              | 1385.6479           | 1385.6431              | 3.48      |
|              | peptide + HexNAc2 + Hex        | 1547.6915           | 1547.6959              | -2.85     |
|              | peptide + HexNAc2 + Hex2       | 1709.7505           | 1709.7487              | 1.04      |
|              | peptide + HexNAc2 + Hex3       | 1871.7977           | 1871.8016              | -2.06     |
|              |                                |                     |                        |           |
|              | possible backbone product ions | 8                   | % found                |           |
|              | y ions                         | 8                   | 100%                   |           |
|              | b ions                         | 5                   | 63%                    |           |
